# Supplementary material
Source: PubMed Central journal article supplement (PMC11249343)
Supplement: media-1.pdf [file media-1.pdf]

# Protocol Capture

July 11, 2024

## 1 Prerequisites

### 1.1 Datasets

High quality datasets from [1, 2] are used for the experiments. See original papers for details of datasets.

Datasets can be downloaded from [https://figshare.com/articles/dataset/Well-curated\\_QSAR\\_datasets\\_for\\_diverse\\_protein\\_targets/20539893](https://figshare.com/articles/dataset/Well-curated_QSAR_datasets_for_diverse_protein_targets/20539893)

Decompress the downloaded file, to get .sdf files.

### 1.2 Creating BCL Features

This section will process the datasets described in the previous section into BCL features. The output of this section is a new folder named BCL-feats and BCL features are stored in (dataset-BCL-feat.csv) in that folder.

BCL can be downloaded at <https://github.com/BCLCommons/bcl/>. See <https://www.frontiersin.org/articles/10.3389/fphar.2022.833099/full> for an introduction of BCL. The following scripts assume the *bcl.exe* command points to a working BCL program.

After downloading the scripts (.py) and configuration files (.object) from <https://github.com/meilerlab/gnn-descriptor/BCL>, place them according to Fig. 1.

When at the BCL folder, execute the following commands step by step to generate BCL features:

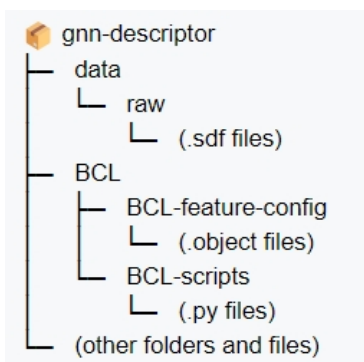

Figure 1: In order to run the codes, the files should be named and placed according to this diagram. The datasets (.sdf files) should be placed under *raw* folder. The BCL configuration files (.object) should be placed under *BCL-feature-config* folder. The BCL-scripts should be placed under *BCL-scripts* folder. All the other files and folders from the github repository are placed as they are in the gnn-descriptor folder.

```

1 python BCL-scripts/1_combine_sdf.py # This combines active and
  inactive SDF files into one SDF file.

1 python BCL-scripts/2_add_id_to_sdf.py # This will add IDs to the
  header of each molecule in the SDF. So it is easy to identify
  which molecules are filtered out in the later steps.

1 python BCL-scripts/3_filter.py # Add hydrogen, neutralize molecules
  and filter out molecules that do not have simple atoms (C, O,
  N, S, P, F, Cl, Br, I)

1 python BCL-scripts/4_data_preparation.py # This creates the BCL
  features and stores that in the BCL-feats folder.

1 python BCL-scripts/5_count_unmatched.py # This counts how many
  molecules are filtered out.

1 python BCL-scripts/6_clean_intermediate.py # This cleans up the
  generated intermediate files to save hardware space. '
  
```

## 2 Running the Codes

### 2.1 General Instructions

Install the following python library:

- pytorch 2.0.1
- torch-geometric 2.3.0
- pytorch-scatter 2.1.2
- rdkit 2023.9.1
- tqdm
- pandas 2.1.2
- numpy 1.26.1

All necessary scripts can be downloaded at <https://github.com/meilerlab/gnn-descriptor>

To run the codes, the first thing is to set the running parameters as a .cfg file in the config folder. Below, an example of a GCN configuration file is shown as *GCN.cfg*

```
1 [GENERAL]
2 seed = 1
3 num_workers = 12
4
5 [DATA]
6 dataset_name = 1798
7 root = data
8 split_scheme = random1_IARatio100_cv0
9
10 [TRAIN]
11 num_epochs = 50
12 batch_size = 32
13 warmup_iterations = 2000
14 peak_lr = 1.4e-4
15 end_lr = 1e-9
16
17
18 [MODEL]
19 model_type = gcn # all model names should be lowercased
20 in_channels = 28
21 hidden_channels = 32
22 num_layers = 4
23 with_bcl = False
24 bcl_dim = 391
```

The experiments in the main texts used `split_scheme = ['random1_IARatio100_cv0', 'random1_IARatio100_cv1', 'random1_IARatio100_cv2']` and `mode.type = ['mlp', 'gcn', 'schNet', 'spherenet']`

Example command:

```
1 python main --config config/GCN.cfg --no_train_eval --test
```

The *GCN.cfg* should be replaced with a configuration file specified by the user.

*-config* is a required flag and it specifies the configuration file.

*-no\_train\_eval* is an optional flag. When the flag is added, the training evaluation is skipped.

*-test* is an optional flag. When the flag is added, the training is skipped and a saved model (in *saved\_model* folder) is directly evaluated at the testing set.

## 2.2 Use Cases

### Use User-Specified Data

Place the *.sdf* files in the *raw* folder in Fig. 1. There should also be a file specifying how the data is split into train and test. The split file is put into *split* folder. The split file is a *.pt* file that contains a python dictionary. The dictionary has two keys, 'train' and 'test'. The value for either key is a list of index numbers of the data.

An example *split.pt* file: {'train':[1,3,8,...2943], 'test':[2,4,5,6,7, 2944]}

### Train a Model

To train the model scratch, first set the *model.cfg* configuration file and placing that in the *config* folder as shown in Sec. 2.1, you can train the model with

```
1 python main --config config/model.cfg
```

\*If you do not want to see the evaluation metrics during metrics, *-no\_train\_eval* flag can be used to speed up the training.

### Test a Pre-trained Model

First, place the pre-trained model in the *saved\_model* folder. Then the model can be run with the test model with the following command:

```
1 python main --config config/model.cfg --test
```

The *-test* flag helps to skip the training process and directly evaluate the model

## References

- [1] Butkiewicz, M., Lowe Jr, E. W., Mueller, R., Mendenhall, J. L., Teixeira, P. L., Weaver, C. D., and Meiler, J. (2013). Benchmarking ligand-based virtual high-throughput screening with the pubchem database. *Molecules*, 18(1):735–756.
- [2] Butkiewicz, M., Wang, Y., Bryant, S. H., Lowe Jr, E. W., Weaver, D. C., and Meiler, J. (2017). High-throughput screening assay datasets from the pubchem database. *Chemical informatics (Wilmington, Del.)*, 3(1).
